# Supplementary material for: Zoom in on Antibody Aggregates: A Potential Pitfall in the Search of Rare EV Populations
Source: MDPI journal article supplement (doi:10.3390/biomedicines9020206), 2021-02-18
Supplement: s1 [file s1]

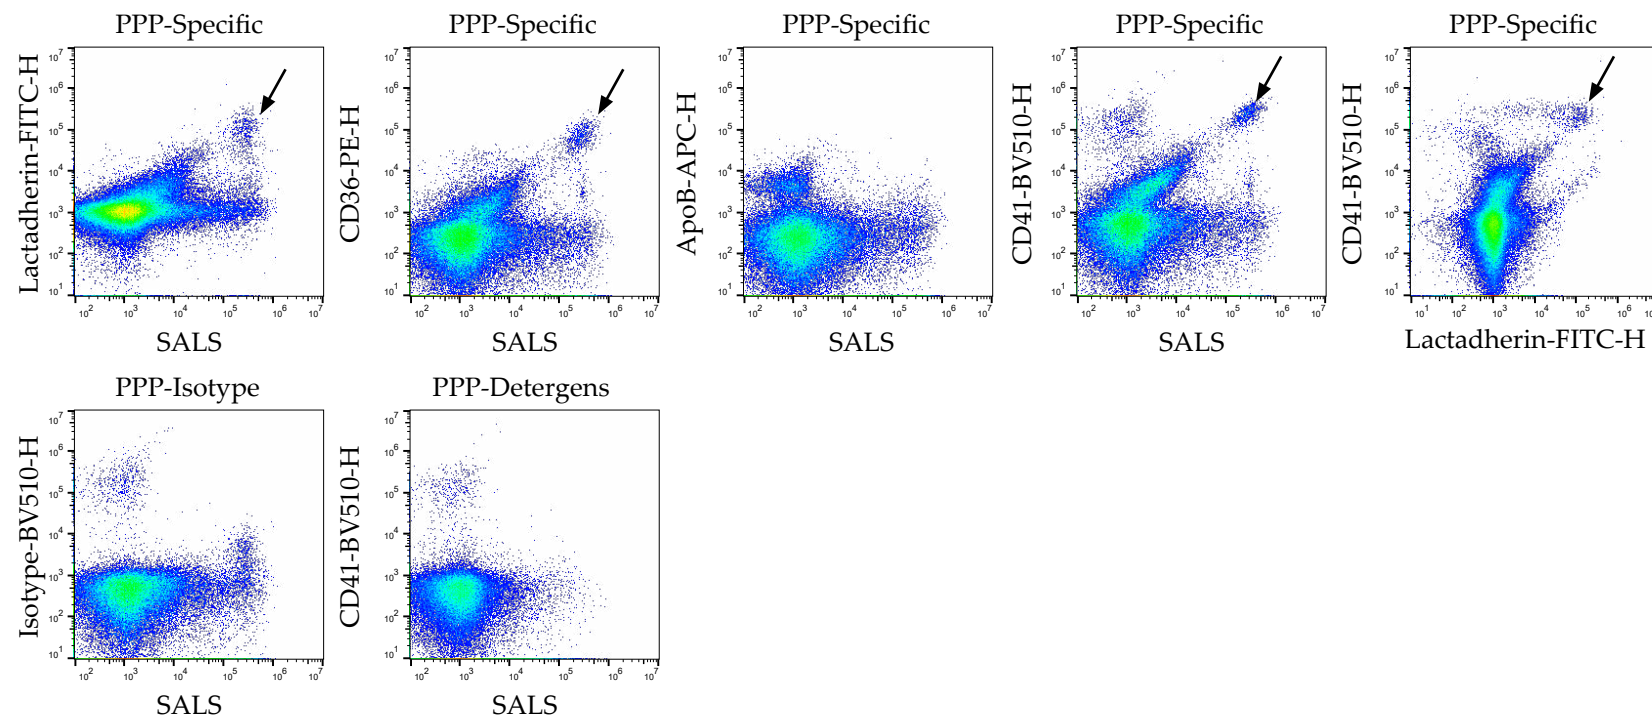

**Figure S9** SALS vs. fluorescence or lactadherin-FITC vs. CD41-BV510 scatterplots of PPP labelled with either lactadherin-FITC, CD41-BV510, CD36-PE and ApoB-APC or corresponding isotypes and lactadherin-FITC. PPP-detergens is specific labelled PPP treated with Triton-X100. Arrows indicates aggregates + multiple EVs.
