# Supplementary material for: Zoom in on Antibody Aggregates: A Potential Pitfall in the Search of Rare EV Populations
Source: MDPI journal article supplement (doi:10.3390/biomedicines9020206), 2021-02-18
Supplement: s1 [file s1]

**Table S2. Reduction (%) of mean event concentrations (evt/ $\mu$ l) of P1 and P2 in PBS treated with either 5, 10 or 30min centrifugation (C5, C10 or C30) or filtered (F) or washed filter (WF), compared to evt/ $\mu$ l in PBS labelled with untreated labels (Table 3)**

| Treatment | Panel (all fluorophores) | Mean conc. $\pm$ SD (events/ $\mu$ l) | Reduction %<br>(compared to U) $\pm$ SD |
|-----------|--------------------------|---------------------------------------|-----------------------------------------|
| C5        | P1 specific ( $n=15$ )   | 31823 $\pm$ 42899                     | 7 $\pm$ 40                              |
|           | P1 isotype ( $n=15$ )    | 31922 $\pm$ 46637                     | 13 $\pm$ 49                             |
|           | P2 specific ( $n=20$ )   | 31110 $\pm$ 11812                     | 2 $\pm$ 31                              |
|           | P2 isotype ( $n=20$ )    | 85901 $\pm$ 71794                     | -10 $\pm$ 56                            |
| C5 total  | All ( $n=70$ )           | 47091 $\pm$ 53701                     | 2 $\pm$ 45                              |
| C10       | P1 specific ( $n=15$ )   | 26140 $\pm$ 36152                     | 23 $\pm$ 36                             |
|           | P1 isotype ( $n=15$ )    | 34863 $\pm$ 48642                     | 2 $\pm$ 50                              |
|           | P2 specific ( $n=20$ )   | 25340 $\pm$ 9858                      | 19 $\pm$ 27                             |
|           | P2 isotype ( $n=20$ )    | 68399 $\pm$ 40523                     | 7 $\pm$ 33                              |
| C10 total | All ( $n=70$ )           | 39845 $\pm$ 39594                     | 13 $\pm$ 37                             |
| C30       | P1 specific ( $n=15$ )   | 29274 $\pm$ 40968                     | 21 $\pm$ 45                             |
|           | P1 isotype ( $n=15$ )    | 17192 $\pm$ 25533                     | 56 $\pm$ 30                             |
|           | P2 specific ( $n=20$ )   | 34105 $\pm$ 11232                     | -11 $\pm$ 40                            |
|           | P2 isotype ( $n=20$ )    | 58088 $\pm$ 32226                     | 21 $\pm$ 23                             |
| C30       | All ( $n=70$ )           | 36298 $\pm$ 31979                     | 19 $\pm$ 42                             |
| F         | P1 specific ( $n=15$ )   | 13648 $\pm$ 18583                     | 44 $\pm$ 20                             |
|           | P1 isotype ( $n=15$ )    | 11891 $\pm$ 15854                     | 42 $\pm$ 27                             |
|           | P2 specific ( $n=20$ )   | 15524 $\pm$ 6584                      | 48 $\pm$ 27                             |
|           | P2 isotype ( $n=20$ )    | 31133 $\pm$ 10417                     | 53 $\pm$ 20                             |
| F total   | All ( $n=70$ )           | 18803 $\pm$ 15041                     | 47 $\pm$ 24                             |
| WF        | P1 specific ( $n=15$ )   | 13459 $\pm$ 19306                     | 53 $\pm$ 20                             |
|           | P1 isotype ( $n=15$ )    | 9989 $\pm$ 13941                      | 60 $\pm$ 24                             |
|           | P2 specific ( $n=20$ )   | 14114 $\pm$ 3180                      | 54 $\pm$ 13                             |
|           | P2 isotype ( $n=20$ )    | 26162 $\pm$ 10724                     | 61 $\pm$ 17                             |
| WF total  | All ( $n=70$ )           | 16532 $\pm$ 13764                     | 57 $\pm$ 18                             |
