# Supplementary material for: Zoom in on Antibody Aggregates: A Potential Pitfall in the Search of Rare EV Populations
Source: MDPI journal article supplement (doi:10.3390/biomedicines9020206), 2021-02-18
Supplement: s1 [file s1]

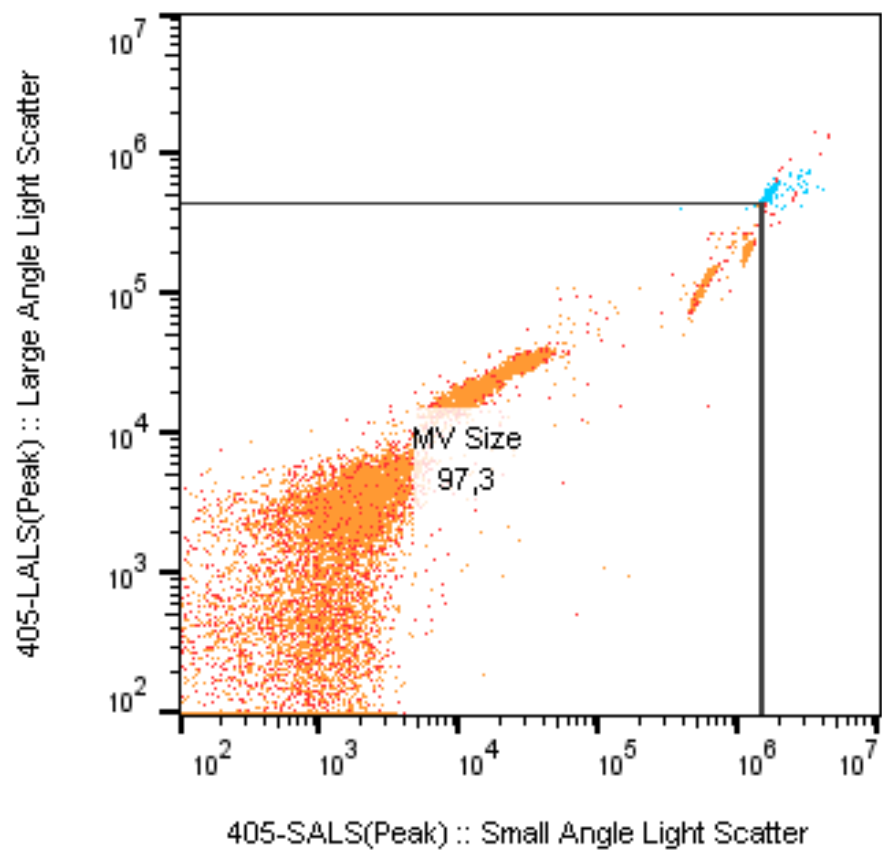

|  | Sample Name                    | Subset Name | Count  |
|--|--------------------------------|-------------|--------|
|  | 20180626_QA_ApogeeMix_01_0.fcs | MV Size     | 103633 |
|  | 20180626_QA_ApogeeMix_01_0.fcs | Si 1300     | 1001   |
|  | 20180626_QA_ApogeeMix_01_0.fcs | Ungated     | 106515 |

**Figure S1.** MV-size gate was established by using ApogeeMix beads
