# Supplementary material for: Zoom in on Antibody Aggregates: A Potential Pitfall in the Search of Rare EV Populations
Source: MDPI journal article supplement (doi:10.3390/biomedicines9020206), 2021-02-18
Supplement: s1 [file s1]

**Table S1.** Statistical comparison of each treatment to any other treatment, for P1-specific or isotype and P2 specific or isotype, both for each label alone (FITC, PE, APC and AF700) or combined (All labels) for P1-specific, P1-isotype, P2-specific or P2-isotype, and combined for all panels and all labels. Statistical significance was defined as  $p < 0.05$ .   =  $p < 0.05$ .

|             |     | FITC <sup>1</sup>                                     |                                                       |                                                       |                                                       |                                                       | PE <sup>1</sup>                                       |                                                       |                                                       |                                                       |                                                       | APC <sup>1</sup>                                      |                                                       |                                                       |                                                       |                                                       | AF700 <sup>1</sup>                                    |                                                       |                                                       |                                                       |                                                       | All labels                                                |                                                           |                                                           |                                                           |                                                           |
|-------------|-----|-------------------------------------------------------|-------------------------------------------------------|-------------------------------------------------------|-------------------------------------------------------|-------------------------------------------------------|-------------------------------------------------------|-------------------------------------------------------|-------------------------------------------------------|-------------------------------------------------------|-------------------------------------------------------|-------------------------------------------------------|-------------------------------------------------------|-------------------------------------------------------|-------------------------------------------------------|-------------------------------------------------------|-------------------------------------------------------|-------------------------------------------------------|-------------------------------------------------------|-------------------------------------------------------|-------------------------------------------------------|-----------------------------------------------------------|-----------------------------------------------------------|-----------------------------------------------------------|-----------------------------------------------------------|-----------------------------------------------------------|
|             |     | C10                                                   | C30                                                   | C5                                                    | F                                                     | U                                                     | C10                                                   | C30                                                   | C5                                                    | F                                                     | U                                                     | C10                                                   | C30                                                   | C5                                                    | F                                                     | U                                                     | C10                                                   | C30                                                   | C5                                                    | F                                                     | U                                                     | C10                                                       | C30                                                       | C5                                                        | F                                                         | U                                                         |
| P1 specific | C30 | 0.69                                                  | NA                                                    | NA                                                    | NA                                                    | NA                                                    | 0.69                                                  | NA                                                    | NA                                                    | NA                                                    | NA                                                    | 0.69                                                  | NA                                                    | 0.841                                                     | NA                                                        | NA                                                        | NA                                                        | NA                                                        |
|             | C5  | 0.421                                                 | 0.841                                                 | NA                                                    | NA                                                    | NA                                                    | 0.421                                                 | 0.421                                                 | NA                                                    | NA                                                    | NA                                                    | 0.095                                                 | 0.151                                                 | NA                                                    | 0.192                                                     | 0.369                                                     | NA                                                        | NA                                                        | NA                                                        |
|             | F   | 0.151                                                 | <span style="background-color: #f8d7da;">0.032</span> | <span style="background-color: #f8d7da;">0.032</span> | NA                                                    | NA                                                    | 0.095                                                 | 0.222                                                 | 0.056                                                 | NA                                                    | NA                                                    | <span style="background-color: #f8d7da;">0.016</span> | 0.222                                                 | 0.841                                                 | NA                                                    | 0.192                                                     | 0.052                                                     | <span style="background-color: #f8d7da;">0.005</span>     | NA                                                        | NA                                                        |
|             | U   | 0.841                                                 | 0.69                                                  | 0.69                                                  | 0.548                                                 | NA                                                    | 0.31                                                  | 0.222                                                 | 1                                                     | <span style="background-color: #f8d7da;">0.016</span> | NA                                                    | 0.151                                                 | 0.056                                                 | 0.421                                                 | 0.421                                                 | NA                                                    | NA                                                    | NA                                                    | NA                                                    | NA                                                    | NA                                                    | 0.547                                                     | 0.547                                                     | 0.62                                                      | <span style="background-color: #f8d7da;">0.043</span>     | NA                                                        |
|             | WF  | 0.151                                                 | 0.056                                                 | 0.056                                                 | 1                                                     | 0.31                                                  | 0.095                                                 | 0.151                                                 | <span style="background-color: #f8d7da;">0.016</span> | <span style="background-color: #f8d7da;">0.548</span> | <span style="background-color: #f8d7da;">0.032</span> | 0.151                                                 | 0.69                                                  | <span style="background-color: #f8d7da;">0.008</span> | <span style="background-color: #f8d7da;">0.008</span> | 0.151                                                 | NA                                                    | NA                                                    | NA                                                    | NA                                                    | NA                                                    | <span style="background-color: #f8d7da;">0.006</span>     | <span style="background-color: #f8d7da;">0.023</span>     | <span style="background-color: #f8d7da;">&lt;0.001</span> | 0.201                                                     | <span style="background-color: #f8d7da;">0.012</span>     |
| P1 isotype  | C30 | 0.151                                                 | NA                                                    | NA                                                    | NA                                                    | NA                                                    | <span style="background-color: #f8d7da;">0.032</span> | NA                                                    | NA                                                    | NA                                                    | NA                                                    | <span style="background-color: #f8d7da;">0.032</span> | NA                                                    | <span style="background-color: #f8d7da;">0.004</span>     | NA                                                        | NA                                                        | NA                                                        | NA                                                        |
|             | C5  | 1                                                     | 0.31                                                  | NA                                                    | NA                                                    | NA                                                    | 0.69                                                  | 0.056                                                 | NA                                                    | NA                                                    | NA                                                    | 0.548                                                 | 0.056                                                 | NA                                                    | 0.583                                                     | <span style="background-color: #f8d7da;">0.026</span>     | NA                                                        | NA                                                        | NA                                                        |
|             | F   | 0.056                                                 | 0.31                                                  | <span style="background-color: #f8d7da;">0.032</span> | NA                                                    | NA                                                    | 0.056                                                 | 0.222                                                 | 0.222                                                 | NA                                                    | NA                                                    | 0.548                                                 | <span style="background-color: #f8d7da;">0.016</span> | 0.421                                                 | NA                                                    | <span style="background-color: #f8d7da;">0.017</span>     | 0.547                                                     | 0.056                                                     | NA                                                        | NA                                                        |
|             | U   | 0.31                                                  | 0.421                                                 | 0.548                                                 | 0.222                                                 | NA                                                    | 0.841                                                 | 0.151                                                 | 0.841                                                 | 0.421                                                 | NA                                                    | 0.31                                                  | <span style="background-color: #f8d7da;">0.016</span> | 0.222                                                 | 0.841                                                 | NA                                                    | NA                                                    | NA                                                    | NA                                                    | NA                                                    | NA                                                    | 0.659                                                     | <span style="background-color: #f8d7da;">0.017</span>     | 0.82                                                      | 0.052                                                     | NA                                                        |
|             | WF  | <span style="background-color: #f8d7da;">0.032</span> | <span style="background-color: #f8d7da;">0.056</span> | <span style="background-color: #f8d7da;">0.008</span> | 1                                                     | 0.151                                                 | <span style="background-color: #f8d7da;">0.032</span> | 1                                                     | 0.095                                                 | 0.151                                                 | 0.095                                                 | 0.548                                                 | 0.31                                                  | 0.421                                                 | 0.151                                                 | 0.151                                                 | NA                                                    | NA                                                    | NA                                                    | NA                                                    | NA                                                    | <span style="background-color: #f8d7da;">&lt;0.001</span> | 0.478                                                     | <span style="background-color: #f8d7da;">&lt;0.001</span> | 0.142                                                     | <span style="background-color: #f8d7da;">0.003</span>     |
| P2 specific | C30 | 0.841                                                 | NA                                                    | NA                                                    | NA                                                    | NA                                                    | 0.151                                                 | NA                                                    | NA                                                    | NA                                                    | NA                                                    | 0.151                                                 | NA                                                    | NA                                                    | NA                                                    | NA                                                    | 0.222                                                 | NA                                                    | NA                                                    | NA                                                    | NA                                                    | <span style="background-color: #f8d7da;">0.017</span>     | NA                                                        | NA                                                        | NA                                                        | NA                                                        |
|             | C5  | 0.69                                                  | 1                                                     | NA                                                    | NA                                                    | NA                                                    | 0.095                                                 | 0.841                                                 | NA                                                    | NA                                                    | NA                                                    | 0.841                                                 | 0.095                                                 | NA                                                    | NA                                                    | NA                                                    | 0.548                                                 | 0.421                                                 | NA                                                    | NA                                                    | NA                                                    | 0.148                                                     | 0.209                                                     | NA                                                        | NA                                                        | NA                                                        |
|             | F   | <span style="background-color: #f8d7da;">0.008</span> | <span style="background-color: #f8d7da;">0.008</span> | <span style="background-color: #f8d7da;">0.008</span> | NA                                                    | NA                                                    | 0.69                                                  | 0.056                                                 | <span style="background-color: #f8d7da;">0.016</span> | NA                                                    | NA                                                    | 0.69                                                  | 0.056                                                 | 0.421                                                 | NA                                                    | NA                                                    | 0.095                                                 | <span style="background-color: #f8d7da;">0.032</span> | <span style="background-color: #f8d7da;">0.032</span> | NA                                                    | NA                                                    | <span style="background-color: #f8d7da;">&lt;0.001</span> | <span style="background-color: #f8d7da;">&lt;0.001</span> | <span style="background-color: #f8d7da;">&lt;0.001</span> | NA                                                        | NA                                                        |
|             | U   | 0.31                                                  | 0.69                                                  | 0.69                                                  | <span style="background-color: #f8d7da;">0.008</span> | NA                                                    | 0.151                                                 | 1                                                     | 0.841                                                 | <span style="background-color: #f8d7da;">0.032</span> | NA                                                    | 0.421                                                 | 0.222                                                 | 1                                                     | 0.31                                                  | NA                                                    | 0.31                                                  | 0.421                                                 | 0.548                                                 | <span style="background-color: #f8d7da;">0.016</span> | NA                                                    | 0.104                                                     | 0.289                                                     | 0.923                                                     | <span style="background-color: #f8d7da;">&lt;0.001</span> | NA                                                        |
|             | WF  | <span style="background-color: #f8d7da;">0.008</span> | <span style="background-color: #f8d7da;">0.008</span> | <span style="background-color: #f8d7da;">0.008</span> | 0.222                                                 | <span style="background-color: #f8d7da;">0.008</span> | 0.151                                                 | <span style="background-color: #f8d7da;">0.016</span> | <span style="background-color: #f8d7da;">0.008</span> | <span style="background-color: #f8d7da;">0.421</span> | <span style="background-color: #f8d7da;">0.016</span> | 0.151                                                 | <span style="background-color: #f8d7da;">0.008</span> | <span style="background-color: #f8d7da;">0.032</span> | 0.222                                                 | <span style="background-color: #f8d7da;">0.032</span> | <span style="background-color: #f8d7da;">0.032</span> | 0.016                                                 | <span style="background-color: #f8d7da;">0.008</span> | 1                                                     | <span style="background-color: #f8d7da;">0.008</span> | <span style="background-color: #f8d7da;">&lt;0.001</span> | <span style="background-color: #f8d7da;">&lt;0.001</span> | <span style="background-color: #f8d7da;">&lt;0.001</span> | 0.758                                                     | <span style="background-color: #f8d7da;">&lt;0.001</span> |
| P2 isotype  | C30 | 0.421                                                 | NA                                                    | NA                                                    | NA                                                    | NA                                                    | 0.151                                                 | NA                                                    | NA                                                    | NA                                                    | NA                                                    | 0.222                                                 | NA                                                    | NA                                                    | NA                                                    | NA                                                    | 0.548                                                 | NA                                                    | NA                                                    | NA                                                    | NA                                                    | 0.068                                                     | NA                                                        | NA                                                        | NA                                                        | NA                                                        |
|             | C5  | 0.151                                                 | 0.095                                                 | NA                                                    | NA                                                    | NA                                                    | 0.69                                                  | 0.056                                                 | NA                                                    | NA                                                    | NA                                                    | 0.69                                                  | 0.31                                                  | NA                                                    | NA                                                    | NA                                                    | 0.841                                                 | 0.31                                                  | NA                                                    | NA                                                    | NA                                                    | 0.923                                                     | <span style="background-color: #f8d7da;">0.016</span>     | NA                                                        | NA                                                        | NA                                                        |
|             | F   | <span style="background-color: #f8d7da;">0.008</span> | <span style="background-color: #f8d7da;">0.008</span> | <span style="background-color: #f8d7da;">0.008</span> | NA                                                    | NA                                                    | <span style="background-color: #f8d7da;">0.032</span> | 0.056                                                 | <span style="background-color: #f8d7da;">0.008</span> | NA                                                    | NA                                                    | 0.222                                                 | 0.548                                                 | 0.222                                                 | NA                                                    | NA                                                    | 0.095                                                 | 0.222                                                 | <span style="background-color: #f8d7da;">0.008</span> | NA                                                    | NA                                                    | <span style="background-color: #f8d7da;">&lt;0.001</span> | <span style="background-color: #f8d7da;">&lt;0.001</span> | <span style="background-color: #f8d7da;">&lt;0.001</span> | NA                                                        | NA                                                        |
|             | U   | 1                                                     | 0.69                                                  | 0.222                                                 | <span style="background-color: #f8d7da;">0.008</span> | NA                                                    | 1                                                     | <span style="background-color: #f8d7da;">0.032</span> | 0.421                                                 | <span style="background-color: #f8d7da;">0.008</span> | NA                                                    | 0.548                                                 | <span style="background-color: #f8d7da;">0.032</span> | 0.421                                                 | <span style="background-color: #f8d7da;">0.032</span> | NA                                                    | 0.151                                                 | 0.095                                                 | 0.31                                                  | <span style="background-color: #f8d7da;">0.008</span> | NA                                                    | 0.441                                                     | <span style="background-color: #f8d7da;">0.002</span>     | 0.407                                                     | <span style="background-color: #f8d7da;">&lt;0.001</span> | NA                                                        |
|             | WF  | <span style="background-color: #f8d7da;">0.008</span> | <span style="background-color: #f8d7da;">0.008</span> | <span style="background-color: #f8d7da;">0.008</span> | 0.841                                                 | <span style="background-color: #f8d7da;">0.008</span> | <span style="background-color: #f8d7da;">0.016</span> | <span style="background-color: #f8d7da;">0.016</span> | <span style="background-color: #f8d7da;">0.008</span> | 0.69                                                  | <span style="background-color: #f8d7da;">0.008</span> | <span style="background-color: #f8d7da;">0.016</span> | <span style="background-color: #f8d7da;">0.008</span> | <span style="background-color: #f8d7da;">0.016</span> | 0.056                                                 | <span style="background-color: #f8d7da;">0.008</span> | <span style="background-color: #f8d7da;">0.032</span> | 0.056                                                 | <span style="background-color: #f8d7da;">0.008</span> | 0.548                                                 | <span style="background-color: #f8d7da;">0.008</span> | <span style="background-color: #f8d7da;">&lt;0.001</span> | <span style="background-color: #f8d7da;">&lt;0.001</span> | <span style="background-color: #f8d7da;">&lt;0.001</span> | 0.386                                                     | <span style="background-color: #f8d7da;">&lt;0.001</span> |
| All panels  | C30 | NA                                                    | 0.365                                                     | NA                                                        | NA                                                        | NA                                                        | NA                                                        |
|             | C5  | NA                                                    | 0.26                                                      | 0.05                                                      | NA                                                        | NA                                                        | NA                                                        |
|             | F   | NA                                                    | <span style="background-color: #f8d7da;">&lt;0.001</span> | <span style="background-color: #f8d7da;">&lt;0.001</span> | <span style="background-color: #f8d7da;">&lt;0.001</span> | NA                                                        | NA                                                        |
|             | U   | NA                                                    | 0.132                                                     | <span style="background-color: #f8d7da;">0.017</span>     | 0.582                                                     | <span style="background-color: #f8d7da;">&lt;0.001</span> | NA                                                        |
|             | WF  | NA                                                    | <span style="background-color: #f8d7da;">&lt;0.001</span> | <span style="background-color: #f8d7da;">&lt;0.001</span> | <span style="background-color: #f8d7da;">&lt;0.001</span> | 0.05                                                      | <span style="background-color: #f8d7da;">&lt;0.001</span> |

<sup>1</sup> Fluorophores of the respective panel. See details of labels in Table 1. C5, C10 and C30: 5, 10 and 30min centrifugation. F: filtered. WF: washed filter.   =  $p < 0.05$
