# Supplementary material for: Zoom in on Antibody Aggregates: A Potential Pitfall in the Search of Rare EV Populations
Source: MDPI journal article supplement (doi:10.3390/biomedicines9020206), 2021-02-18
Supplement: s1 [file s1]

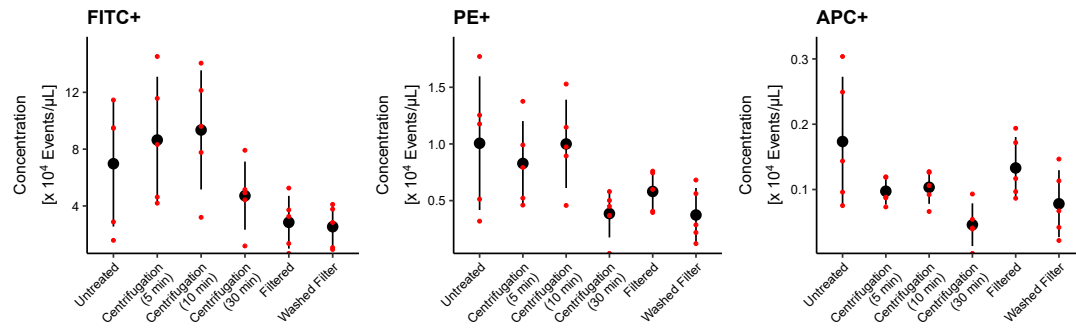

Figure S6 P1, isotype concentrations of FITC, PE and APC aggregates in PBS labelled with P1 isotype labels. Each bar corresponds to pre-treatment as indicated at the x-axis.
