# Supplementary material for: Zoom in on Antibody Aggregates: A Potential Pitfall in the Search of Rare EV Populations
Source: MDPI journal article supplement (doi:10.3390/biomedicines9020206), 2021-02-18
Supplement: s1 [file s1]

**Table S6** Points to consider when designing a label-panel and protocol for a study of EVs by flow cytometry.

| <b>Operator and workflow protocol</b>                                            | <b>Label and master mix of labels</b>                                                                        | <b>Sample type</b>                                                                        | <b>Data acquisition</b>                                            |
|----------------------------------------------------------------------------------|--------------------------------------------------------------------------------------------------------------|-------------------------------------------------------------------------------------------|--------------------------------------------------------------------|
| F method: consider type of filter: size of pores, hydrophobic/hydrophilic filter | Ab-sequence, and fluorophore, is it prone for aggregation?                                                   | Solvent properties (PBS vs. protein/lipid containing organic solvent as plasma)           | Fluorescence threshold                                             |
| Temperature and incubation time                                                  | Solvent properties: pH<br>-protein concentration<br>-ionic strength<br>-hydrophobic surface -area in solvent | Rare or abundant EV-populations, is the number of aggregates significant compared to EVs? | Aggregates with one type of fluorophore or multiple?               |
| Vortexing versus mixing by cautious pipetting                                    | Interaction of labels when combining stocks in master mix                                                    |                                                                                           | Aggregate/EV complexes.                                            |
| Sequential labelling versus labelling with a master mix of labels.               | Lowest possible label concentration in sample.                                                               |                                                                                           | Appropriate controls as labelled PBS and detergent treated samples |
