# Supplementary material for: Zoom in on Antibody Aggregates: A Potential Pitfall in the Search of Rare EV Populations
Source: MDPI journal article supplement (doi:10.3390/biomedicines9020206), 2021-02-18
Supplement: s1 [file s1]

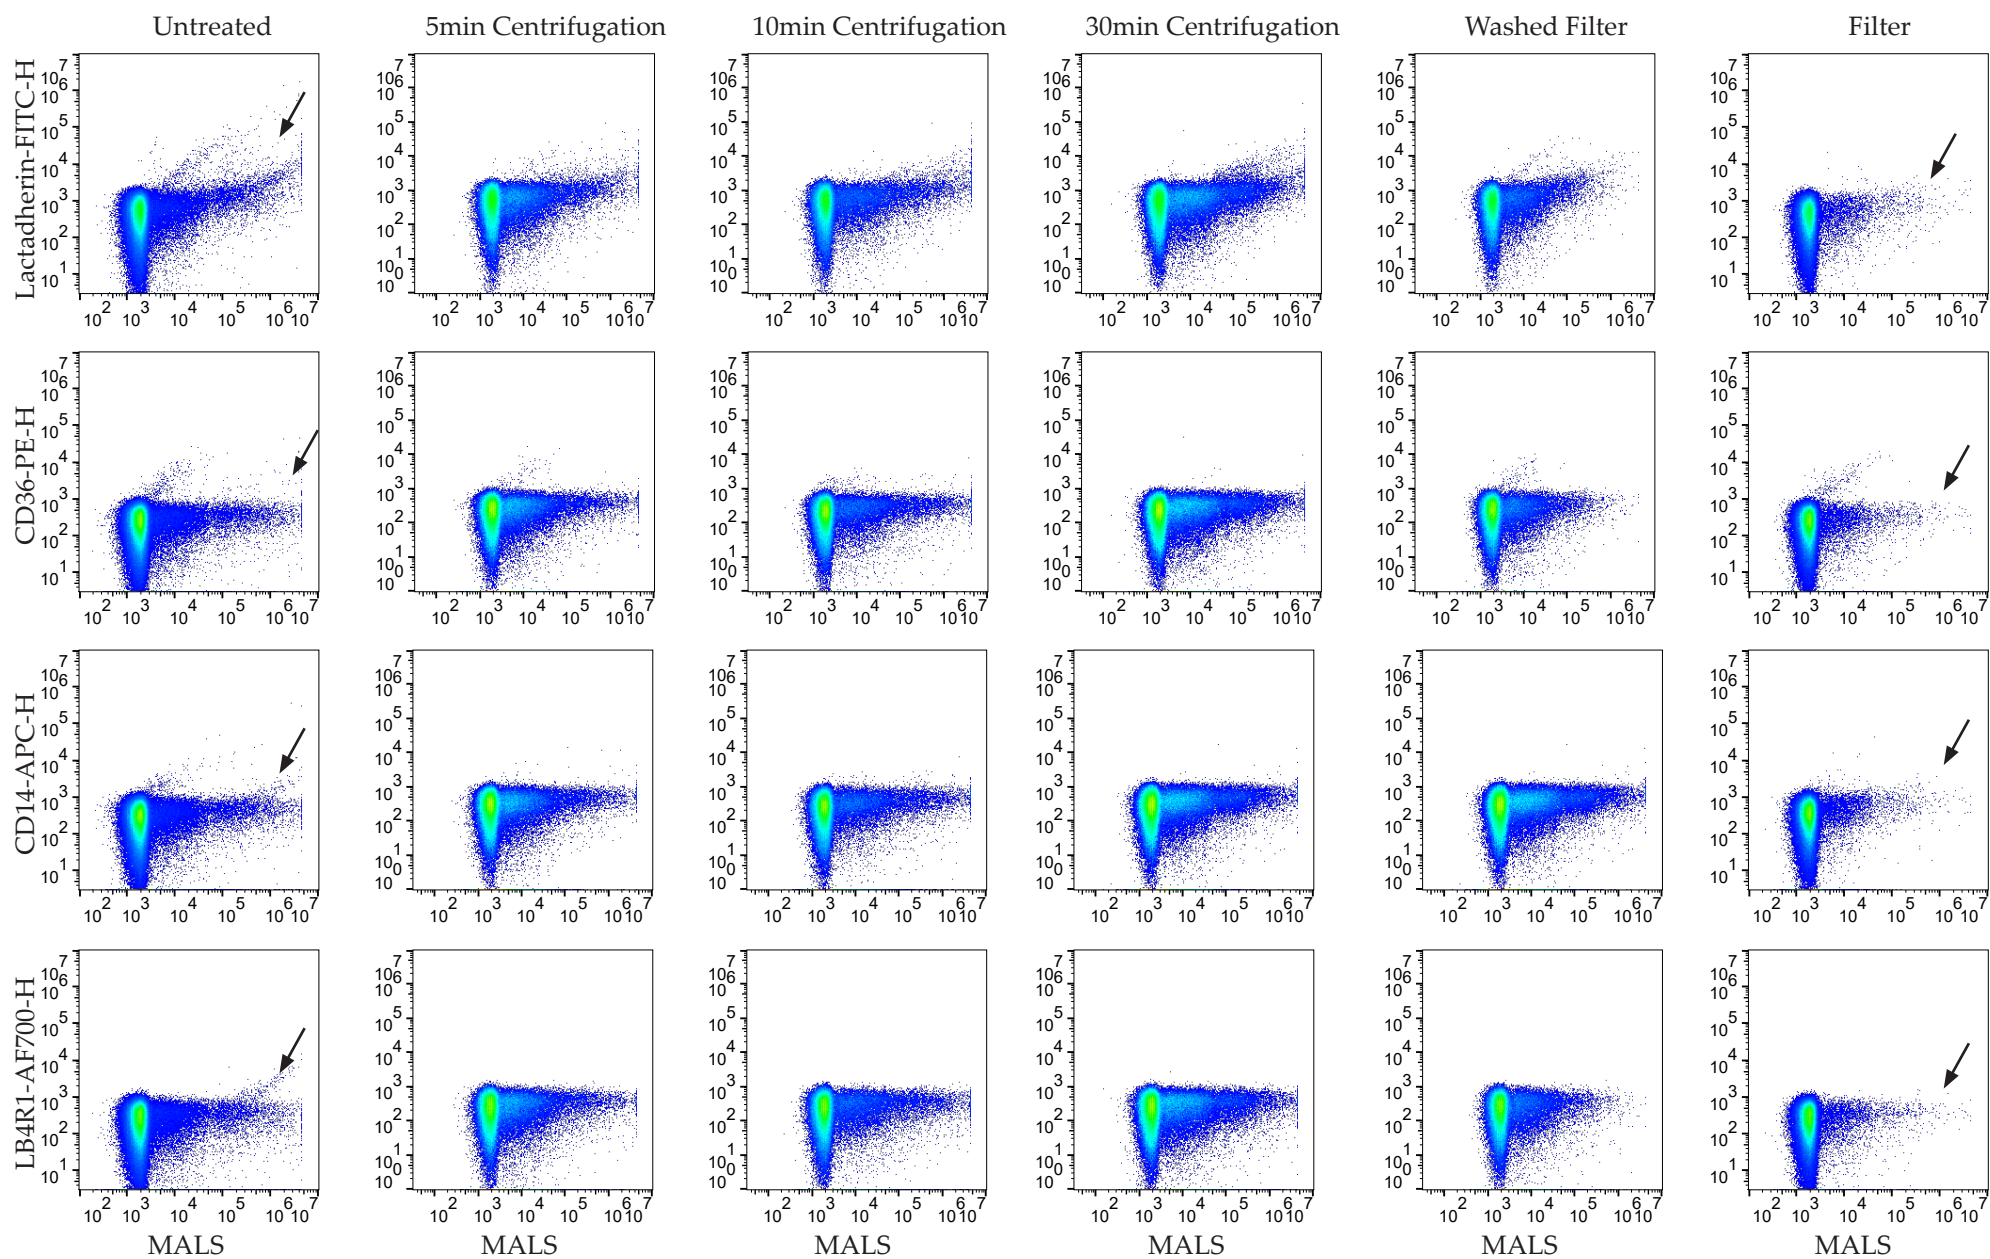

**Figure S3** Representative scatterplots of PBS labelled with P2 specific label. Medium angle light scatter (MALS) versus fluorescence. Column's represent untreated, centrifugated and filtered labels.
