# Supplementary material for: Zoom in on Antibody Aggregates: A Potential Pitfall in the Search of Rare EV Populations
Source: MDPI journal article supplement (doi:10.3390/biomedicines9020206), 2021-02-18
Supplement: s1 [file s1]

**Table S3:** Schematic representations of the shapes and types of the different labels used in the study represented in Figure 5.

|                                                                                                            |                                                                                                                                                                        |
|------------------------------------------------------------------------------------------------------------|------------------------------------------------------------------------------------------------------------------------------------------------------------------------|
| 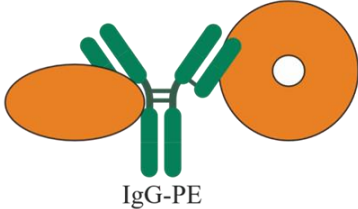 <p>IgG-PE</p>            | <p>Large and heavy biological fluorophores as phycobilliproteins that is globular proteins isolated from red algae.<br/>IgG: 150kDa<br/>APC: 105kDa<br/>PE: 223kDa</p> |
|  <p>IgG-APC</p>           |                                                                                                                                                                        |
|  <p>Lactadherine-FITC</p> | <p>Smaller and lighter organic dyes.<br/>FITC: 0,590kDa<br/>AF700: 1,4kDa Lactadherin: 53-66kDa</p>                                                                    |
|  <p>IgG-AF700</p>        |                                                                                                                                                                        |
|  <p>IgG-BV510</p>       | <p>Organic polymers consisting of aromatic units and side chain modifications<br/>BV510: 77kDa</p>                                                                     |
