# Supplementary material for: Zoom in on Antibody Aggregates: A Potential Pitfall in the Search of Rare EV Populations
Source: MDPI journal article supplement (doi:10.3390/biomedicines9020206), 2021-02-18
Supplement: s1 [file s1]

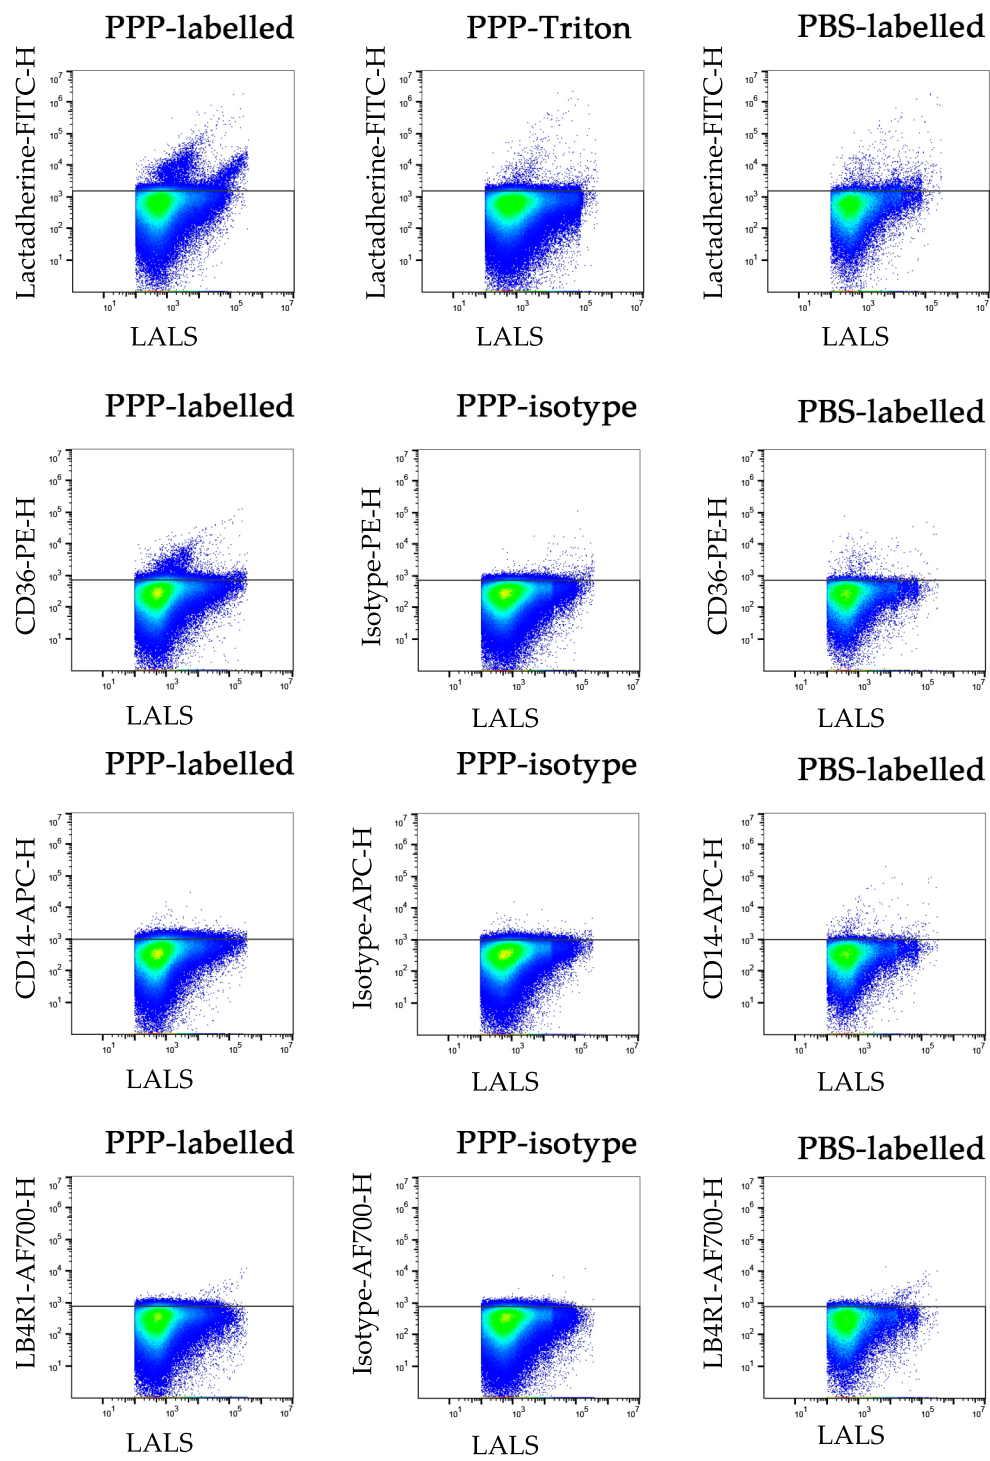

**Figure S2** Gating strategy. All gates were set on PPP and transferred to PBS samples. 99percentile for lactadherine-FITC were set on the triton sample, and for other fluorophores on the isotype labelled sample.
