# Supplementary material for: Zoom in on Antibody Aggregates: A Potential Pitfall in the Search of Rare EV Populations
Source: MDPI journal article supplement (doi:10.3390/biomedicines9020206), 2021-02-18
Supplement: s1 [file s1]

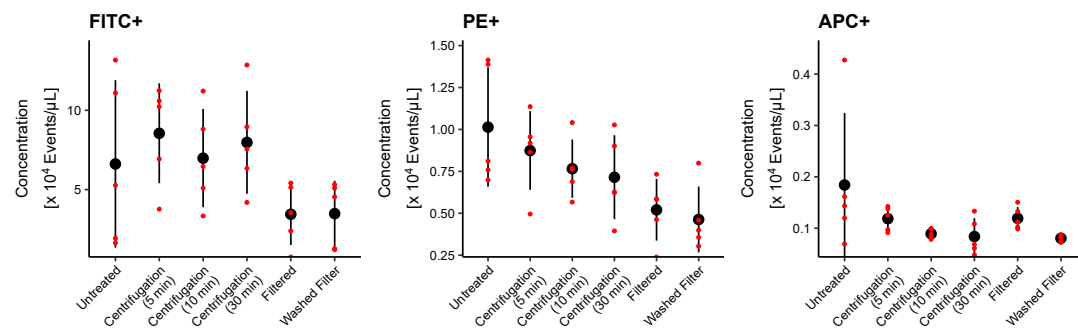

**Figure S5** P1, specific labels. Concentrations of FITC, PE and APC aggregates in PBS labeled with P1 specific labels. Each bar corresponds to pre-treatment as indicated at the x-axis.
