# Supplementary material for: Zoom in on Antibody Aggregates: A Potential Pitfall in the Search of Rare EV Populations
Source: Biomedicines. 2021 Feb 18;9(2):206. doi: 10.3390/biomedicines9020206 (PMC7923005; doi:10.3390/biomedicines9020206)
Supplement: Supplementary file 1 [file biomedicines-09-00206-s001.zip]

Archive with 14 entries (14 files):
- Supplementary for publication/Figure S1.pdf
- Supplementary for publication/Figure S2_Gatingstrategy.pdf
- Supplementary for publication/Figure S3_P2 scatterplots.pdf
- Supplementary for publication/Figure S4_PBS.pdf
- Supplementary for publication/Figure S5_P1 labelled.pdf
- Supplementary for publication/Figure S6_P1 isotype.pdf
- Supplementary for publication/Figure S7_P2 specific.pdf
- Supplementary for publication/Figure S8_P2 isotype.pdf
- Supplementary for publication/Figure S9_multiple EV aggregates.pdf
- Supplementary for publication/Table S1.pdf
- Supplementary for publication/Table S2.pdf
- Supplementary for publication/Table S3.pdf
- Supplementary for publication/Table S4.xlsx
- Supplementary for publication/Table S5.pdf
