# Supplementary material for: Zoom in on Antibody Aggregates: A Potential Pitfall in the Search of Rare EV Populations
Source: Biomedicines. 2021 Feb 18;9(2):206. doi: 10.3390/biomedicines9020206 (PMC7923005; doi:10.3390/biomedicines9020206)
Supplement: Supplementary file 1 [file biomedicines-09-00206-s001.zip › Supplementary for publication/Table S4.xlsx]

## Sheet: table5a
AB.Panel	Label	variable	Treatment	Conc	sd.x	CV.x	percRed	sd.y	CV.y
P1	Isotype	C_APCPos	5min	975.053	205.778	21.1043	43.8398	11.8522	27.0352	1
P1	Isotype	C_FITCPos	5min	86505	44487.4	51.4275	-23.9046	63.7211	266.564	1
P1	Isotype	C_PEPos	5min	8287.31	3730.54	45.0151	17.6964	37.0491	209.359	1
P1	Labelled	C_APCPos	5min	1188.33	232.321	19.5501	35.5427	12.6015	35.4545	1
P1	Labelled	C_FITCPos	5min	85536.4	31469.2	36.7904	-29.1427	47.5122	163.033	1
P1	Labelled	C_PEPos	5min	8744.15	2345.2	26.8202	13.7743	23.1259	167.892	1
P2	Isotype	C_AF700Pos	5min	45311.8	8166.12	18.0221	7.35147	16.6972	227.127	1
P2	Isotype	C_APCPos	5min	50275.2	14145	28.1352	21.0034	22.2259	105.821	1
P2	Isotype	C_FITCPos	5min	185730	85535.1	46.0535	-74.7338	80.4711	107.677	1
P2	Isotype	C_PEPos	5min	62288.6	9998.43	16.0518	7.18349	14.8987	207.402	1
P2	Labelled	C_AF700Pos	5min	24654.5	4624.82	18.7585	4.92157	17.8353	362.39	1
P2	Labelled	C_APCPos	5min	24274.2	11361.5	46.8049	1.51278	46.0969	3047.16	1
P2	Labelled	C_FITCPos	5min	36169.9	11913.8	32.9385	5.26288	31.2049	592.925	1
P2	Labelled	C_PEPos	5min	39340.4	11963.3	30.4098	-5.02501	31.9379	635.579	1
P1	Isotype	C_APCPos	10min	1035.6	254.815	24.6056	40.3525	14.6766	36.371	2
P1	Isotype	C_FITCPos	10min	93546	41935.3	44.8285	-33.9897	60.0656	176.717	2
P1	Isotype	C_PEPos	10min	10006.8	3896.8	38.9415	0.619712	38.7002	6244.87	2
P1	Labelled	C_APCPos	10min	895.123	93.3511	10.4289	51.447	5.06352	9.84221	2
P1	Labelled	C_FITCPos	10min	69861.9	30960.2	44.3162	-5.47742	46.7436	853.388	2
P1	Labelled	C_PEPos	10min	7662.04	1737.77	22.6802	24.445	17.1361	70.1005	2
P2	Isotype	C_AF700Pos	10min	41986.8	9371.52	22.3202	14.15	19.1618	135.419	2
P2	Isotype	C_APCPos	10min	51610.8	19232.3	37.2641	18.9048	30.2193	159.85	2
P2	Isotype	C_FITCPos	10min	116907	51952.8	44.4396	-9.98527	48.877	489.491	2
P2	Isotype	C_PEPos	10min	63089.8	21032.1	33.3368	5.98961	31.34	523.24	2
P2	Labelled	C_AF700Pos	10min	23268	5135.49	22.0711	10.2686	19.8047	192.866	2
P2	Labelled	C_APCPos	10min	19604.9	7344.93	37.4648	20.4574	29.8005	145.671	2
P2	Labelled	C_FITCPos	10min	33325.5	11594.2	34.7907	12.713	30.3677	238.871	2
P2	Labelled	C_PEPos	10min	25161.7	10984.1	43.6541	32.8271	29.3238	89.3279	2
P1	Isotype	C_APCPos	30min	461.163	327.261	70.9643	73.4384	18.8493	25.6668	3
P1	Isotype	C_FITCPos	30min	47250.7	23997.2	50.787	32.3209	34.3722	106.347	3
P1	Isotype	C_PEPos	30min	3864.9	2112.26	54.6524	61.6167	20.9774	34.045	3
P1	Labelled	C_APCPos	30min	839.826	356.164	42.4092	54.4464	19.3189	35.4825	3
P1	Labelled	C_FITCPos	30min	79830.4	32414.8	40.6046	-20.5278	48.9399	238.408	3
P1	Labelled	C_PEPos	30min	7152.07	2503.12	34.9986	29.4737	24.6832	83.7464	3
P2	Isotype	C_AF700Pos	30min	38830.5	9074.07	23.3684	20.6037	18.5537	90.0503	3
P2	Isotype	C_APCPos	30min	43328.9	5951.13	13.7348	31.918	9.35091	29.2967	3
P2	Isotype	C_FITCPos	30min	99244.6	43162.4	43.491	6.63108	40.607	612.374	3
P2	Isotype	C_PEPos	30min	50948.8	5953.88	11.686	24.081	8.87191	36.8419	3
P2	Labelled	C_AF700Pos	30min	27978	6155.54	22.0013	-7.89528	23.7384	300.666	3
P2	Labelled	C_APCPos	30min	35183.5	13082.9	37.1848	-42.7496	53.0812	124.168	3
P2	Labelled	C_FITCPos	30min	36969.8	14227.3	38.4836	3.16765	37.2646	1176.41	3
P2	Labelled	C_PEPos	30min	36290.2	11097.8	30.5808	3.11801	29.6273	950.198	3
P1	Isotype	C_APCPos	Filtered	1331.2	472.714	35.5104	23.3268	27.2269	116.72	4
P1	Isotype	C_FITCPos	Filtered	28527.6	18572	65.1019	59.1388	26.6014	44.9814	4
P1	Isotype	C_PEPos	Filtered	5814.6	1762.24	30.3072	42.2536	17.5013	41.4198	4
P1	Labelled	C_APCPos	Filtered	1194.21	218.906	18.3306	35.2239	11.8739	33.7097	4
P1	Labelled	C_FITCPos	Filtered	34542.1	19406.3	56.1814	47.8483	29.2995	61.2342	4
P1	Labelled	C_PEPos	Filtered	5207.8	1841.07	35.3521	48.6461	18.1547	37.3199	4
P2	Isotype	C_AF700Pos	Filtered	30201.6	7605.89	25.1838	38.2472	15.5517	40.661	4
P2	Isotype	C_APCPos	Filtered	34975.8	14920.8	42.6605	45.0431	23.4449	52.0499	4
P2	Isotype	C_FITCPos	Filtered	28008.2	10301.7	36.7809	73.65	9.69176	13.1592	4
P2	Isotype	C_PEPos	Filtered	31347.6	9852.38	31.4294	53.2887	14.6811	27.55	4
P2	Labelled	C_AF700Pos	Filtered	15059.4	4918.97	32.6638	41.9246	18.9697	45.2471	4
P2	Labelled	C_APCPos	Filtered	17999.7	9119.63	50.6655	26.9701	37.001	137.193	4
P2	Labelled	C_FITCPos	Filtered	10282.9	2608.69	25.3692	73.0667	6.83276	9.3514	4
P2	Labelled	C_PEPos	Filtered	18755.7	6034.83	32.176	49.9289	16.1109	32.2676	4
P1	Isotype	C_APCPos	WashedFilter	782.8	512.683	65.4935	54.913	29.529	53.7742	5
P1	Isotype	C_FITCPos	WashedFilter	25444.2	14864.4	58.4194	63.5552	21.2908	33.4997	5
P1	Isotype	C_PEPos	WashedFilter	3739.4	2378.1	63.5958	62.863	23.6176	37.5699	5
P1	Labelled	C_APCPos	WashedFilter	806.415	67.1162	8.32278	56.2587	3.64049	6.47099	5
P1	Labelled	C_FITCPos	WashedFilter	34937.5	20652.5	59.1125	47.2514	31.1811	65.9898	5
P1	Labelled	C_PEPos	WashedFilter	4633	1962.88	42.3673	54.3141	19.3559	35.6369	5
P2	Isotype	C_AF700Pos	WashedFilter	26440.4	7482.41	28.2992	45.9376	15.2992	33.3043	5
P2	Isotype	C_APCPos	WashedFilter	19596.2	10110.3	51.5933	69.2088	15.8862	22.954	5
P2	Isotype	C_FITCPos	WashedFilter	31933.8	11856.4	37.128	69.9568	11.1544	15.9448	5
P2	Isotype	C_PEPos	WashedFilter	26677.6	12310.8	46.1465	60.2476	18.3443	30.4483	5
P2	Labelled	C_AF700Pos	WashedFilter	15381.6	2637.29	17.1457	40.6819	10.1705	25.0001	5
P2	Labelled	C_APCPos	WashedFilter	12693.8	1007.57	7.93752	48.4977	4.08801	8.42929	5
P2	Labelled	C_FITCPos	WashedFilter	13085.3	2163.05	16.5304	65.7267	5.66553	8.61983	5
P2	Labelled	C_PEPos	WashedFilter	15294.2	5272.02	34.4707	59.1698	14.0744	23.7865	5

## Sheet: C5
AB.Panel	Label	variable	Treatment	Concentration evt/µl	sd.x	CV.x	%Reduction	sd.y	CV.y
P1	Labelled	lactadherin-FITC+	5min	85536.4	31469.2	36.7904	-29.1427	47.5122	163.033	1
P1	Labelled	CD36-PE+	5min	8744.15	2345.2	26.8202	13.7743	23.1259	167.892	2
P1	Labelled	CD62E-APC+	5min	1188.33	232.321	19.5501	35.5427	12.6015	35.4545	3
P1	Isotype	lactadherin-FITC+	5min	86505	44487.4	51.4275	-23.9046	63.7211	266.564	4
P1	Isotype	Isotype-PE+	5min	8287.31	3730.54	45.0151	17.6964	37.0491	209.359	5
P1	Isotype	Isotype-APC+	5min	975.053	205.778	21.1043	43.8398	11.8522	27.0352	6
P2	Labelled	lactadherin-FITC+	5min	36169.9	11913.8	32.9385	5.26288	31.2049	592.925	7
P2	Labelled	CD36-PE+	5min	39340.4	11963.3	30.4098	-5.02501	31.9379	635.579	8
P2	Labelled	CD14-APC+	5min	24274.2	11361.5	46.8049	1.51278	46.0969	3047.16	9
P2	Labelled	BLTR1-AF700+	5min	24654.5	4624.82	18.7585	4.92157	17.8353	362.39	10
P2	Isotype	lactadherin-FITC+	5min	185730	85535.1	46.0535	-74.7338	80.4711	107.677	11
P2	Isotype	Isotype-PE+	5min	62288.6	9998.43	16.0518	7.18349	14.8987	207.402	12
P2	Isotype	Isotype-APC+	5min	50275.2	14145	28.1352	21.0034	22.2259	105.821	13
P2	Isotype	Isotype-AF700+	5min	45311.8	8166.12	18.0221	7.35147	16.6972	227.127	14

## Sheet: C10
AB.Panel	Label	variable	Treatment	Concentration evt/µl	sd.x	CV.x	%Reduction	sd.y	CV.y
P1	Labelled	lactadherin-FITC+	10min	69861.9	30960.2	44.3162	-5.47742	46.7436	853.388
P1	Labelled	CD36-PE+	10min	7662.04	1737.77	22.6802	24.445	17.1361	70.1005
P1	Labelled	CD62E-APC+	10min	895.123	93.3511	10.4289	51.447	5.06352	9.84221
P1	Isotype	lactadherin-FITC+	10min	93546	41935.3	44.8285	-33.9897	60.0656	176.717
P1	Isotype	Isotype-PE+	10min	10006.8	3896.8	38.9415	0.619712	38.7002	6244.87
P1	Isotype	Isotype-APC+	10min	1035.6	254.815	24.6056	40.3525	14.6766	36.371
P2	Labelled	lactadherin-FITC+	10min	33325.5	11594.2	34.7907	12.713	30.3677	238.871
P2	Labelled	CD36-PE+	10min	25161.7	10984.1	43.6541	32.8271	29.3238	89.3279
P2	Labelled	CD14-APC+	10min	19604.9	7344.93	37.4648	20.4574	29.8005	145.671
P2	Labelled	BLTR1-AF700+	10min	23268	5135.49	22.0711	10.2686	19.8047	192.866
P2	Isotype	lactadherin-FITC+	10min	116907	51952.8	44.4396	-9.98527	48.877	489.491
P2	Isotype	Isotype-PE+	10min	63089.8	21032.1	33.3368	5.98961	31.34	523.24
P2	Isotype	Isotype-APC+	10min	51610.8	19232.3	37.2641	18.9048	30.2193	159.85
P2	Isotype	Isotype-AF700+	10min	41986.8	9371.52	22.3202	14.15	19.1618	135.419

## Sheet: C30
AB.Panel	Label	variable	Treatment	Concentration evt/µl	sd.x	CV.x	%Reduction	sd.y	CV.y
P1	Labelled	lactadherin-FITC+	30min	79830.4	32414.8	40.6046	-20.5278	48.9399	238.408	1
P1	Labelled	CD36-PE+	30min	7152.07	2503.12	34.9986	29.4737	24.6832	83.7464	2
P1	Labelled	CD62E-APC+	30min	839.826	356.164	42.4092	54.4464	19.3189	35.4825	3
P1	Isotype	lactadherin-FITC+	30min	47250.7	23997.2	50.787	32.3209	34.3722	106.347	4
P1	Isotype	Isotype-PE+	30min	3864.9	2112.26	54.6524	61.6167	20.9774	34.045	5
P1	Isotype	Isotype-APC+	30min	461.163	327.261	70.9643	73.4384	18.8493	25.6668	6
P2	Labelled	lactadherin-FITC+	30min	36969.8	14227.3	38.4836	3.16765	37.2646	1176.41	7
P2	Labelled	CD36-PE+	30min	36290.2	11097.8	30.5808	3.11801	29.6273	950.198	8
P2	Labelled	CD14-APC+	30min	35183.5	13082.9	37.1848	-42.7496	53.0812	124.168	9
P2	Labelled	BLTR1-AF700+	30min	27978	6155.54	22.0013	-7.89528	23.7384	300.666	10
P2	Isotype	lactadherin-FITC+	30min	99244.6	43162.4	43.491	6.63108	40.607	612.374	11
P2	Isotype	Isotype-PE+	30min	50948.8	5953.88	11.686	24.081	8.87191	36.8419	12
P2	Isotype	Isotype-APC+	30min	43328.9	5951.13	13.7348	31.918	9.35091	29.2967	13
P2	Isotype	Isotype-AF700+	30min	38830.5	9074.07	23.3684	20.6037	18.5537	90.0503	14

## Sheet: F
AB.Panel	Label	variable	Treatment	Concentration evt/µl	sd.x	CV.x	%Reduction	sd.y	CV.y
P1	Labelled	lactadherin-FITC+	Filtered	34542.1	19406.3	56.1814	47.8483	29.2995	61.2342	1
P1	Labelled	CD36-PE+	Filtered	5207.8	1841.07	35.3521	48.6461	18.1547	37.3199	2
P1	Labelled	CD62E-APC+	Filtered	1194.21	218.906	18.3306	35.2239	11.8739	33.7097	3
P1	Isotype	lactadherin-FITC+	Filtered	28527.6	18572	65.1019	59.1388	26.6014	44.9814	4
P1	Isotype	Isotype-PE+	Filtered	5814.6	1762.24	30.3072	42.2536	17.5013	41.4198	5
P1	Isotype	Isotype-APC+	Filtered	1331.2	472.714	35.5104	23.3268	27.2269	116.72	6
P2	Labelled	lactadherin-FITC+	Filtered	10282.9	2608.69	25.3692	73.0667	6.83276	9.3514	7
P2	Labelled	CD36-PE+	Filtered	18755.7	6034.83	32.176	49.9289	16.1109	32.2676	8
P2	Labelled	CD14-APC+	Filtered	17999.7	9119.63	50.6655	26.9701	37.001	137.193	9
P2	Labelled	BLTR1-AF700+	Filtered	15059.4	4918.97	32.6638	41.9246	18.9697	45.2471	10
P2	Isotype	lactadherin-FITC+	Filtered	28008.2	10301.7	36.7809	73.65	9.69176	13.1592	11
P2	Isotype	Isotype-PE+	Filtered	31347.6	9852.38	31.4294	53.2887	14.6811	27.55	12
P2	Isotype	Isotype-APC+	Filtered	34975.8	14920.8	42.6605	45.0431	23.4449	52.0499	13
P2	Isotype	Isotype-AF700+	Filtered	30201.6	7605.89	25.1838	38.2472	15.5517	40.661	14

## Sheet: WF
AB.Panel	Label	variable	Treatment	Concentration evt/µl	sd.x	CV.x	%Reduction	sd.y	CV.y
P1	Labelled	lactadherin-FITC+	WashedFilter	34937.5	20652.5	59.1125	47.2514	31.1811	65.9898	1
P1	Labelled	CD36-PE+	WashedFilter	4633	1962.88	42.3673	54.3141	19.3559	35.6369	2
P1	Labelled	CD62E-APC+	WashedFilter	806.415	67.1162	8.32278	56.2587	3.64049	6.47099	3
P1	Isotype	lactadherin-FITC+	WashedFilter	25444.2	14864.4	58.4194	63.5552	21.2908	33.4997	4
P1	Isotype	Isotype-PE+	WashedFilter	3739.4	2378.1	63.5958	62.863	23.6176	37.5699	5
P1	Isotype	Isotype-APC+	WashedFilter	782.8	512.683	65.4935	54.913	29.529	53.7742	6
P2	Labelled	lactadherin-FITC+	WashedFilter	13085.3	2163.05	16.5304	65.7267	5.66553	8.61983	7
P2	Labelled	CD36-PE+	WashedFilter	15294.2	5272.02	34.4707	59.1698	14.0744	23.7865	8
P2	Labelled	CD14-APC+	WashedFilter	12693.8	1007.57	7.93752	48.4977	4.08801	8.42929	9
P2	Labelled	BLTR1-AF700+	WashedFilter	15381.6	2637.29	17.1457	40.6819	10.1705	25.0001	10
P2	Isotype	lactadherin-FITC+	WashedFilter	31933.8	11856.4	37.128	69.9568	11.1544	15.9448	11
P2	Isotype	Isotype-PE+	WashedFilter	26677.6	12310.8	46.1465	60.2476	18.3443	30.4483	12
P2	Isotype	Isotype-APC+	WashedFilter	19596.2	10110.3	51.5933	69.2088	15.8862	22.954	13
P2	Isotype	Isotype-AF700+	WashedFilter	26440.4	7482.41	28.2992	45.9376	15.2992	33.3043	14
