# Supplementary figures and images for: Zoom in on Antibody Aggregates: A Potential Pitfall in the Search of Rare EV Populations
Source: MDPI journal article supplement (doi:10.3390/biomedicines9020206), 2021-02-18

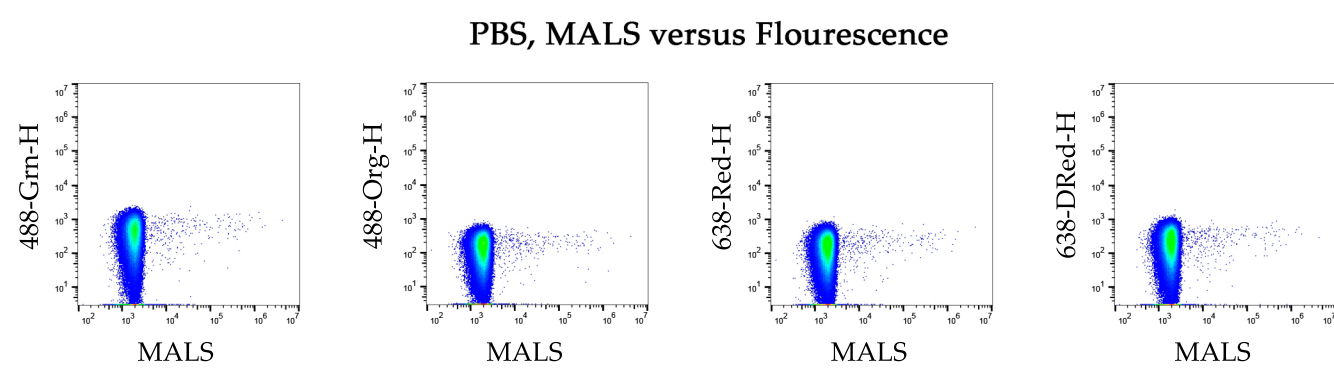

**Figure S4** Scatterplots of PBS only, Medium angle light scatter versus fluorescence.

Supplement: s1 [file s1]
